# Supplementary material for: Green Synthesis of NiO-SnO2 Nanocomposite and Effect of Calcination Temperature on Its Physicochemical Properties: Impact on the Photocatalytic Degradation of Methyl Orange
Source: MDPI journal article supplement (doi:10.3390/molecules27238420), 2022-12-01
Supplement: s1 [file s1]

## Supplementary Materials

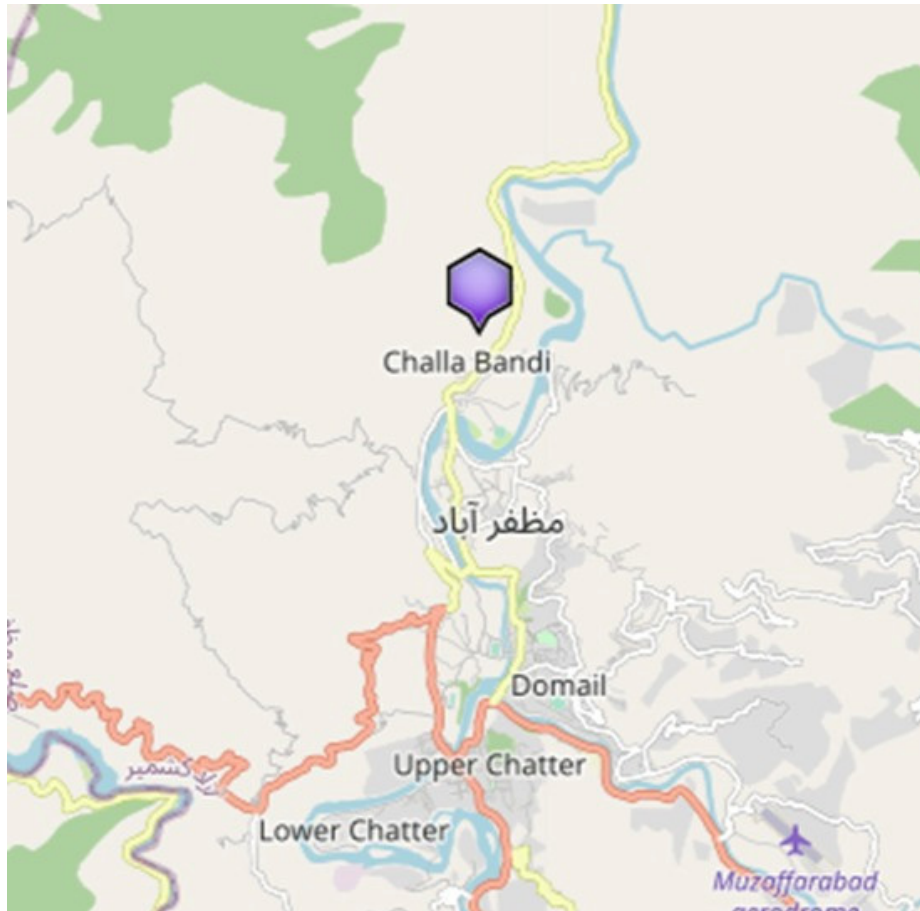

**Figure S1.** Collection of plant material samples (leaves of *F. elastica*). The area from where plant material samples were collected are shown in purple. Obtained from <https://mapcarta.com/N2925426881>, accessed on September 20, 2022.
